# Supplementary material for: Tongue Microbiota Composition and Dental Caries Experience in Primary School Children
Source: PubMed Central journal article supplement (PMC8092142; doi:10.1128/msphere.01252-20), 2021-04-28

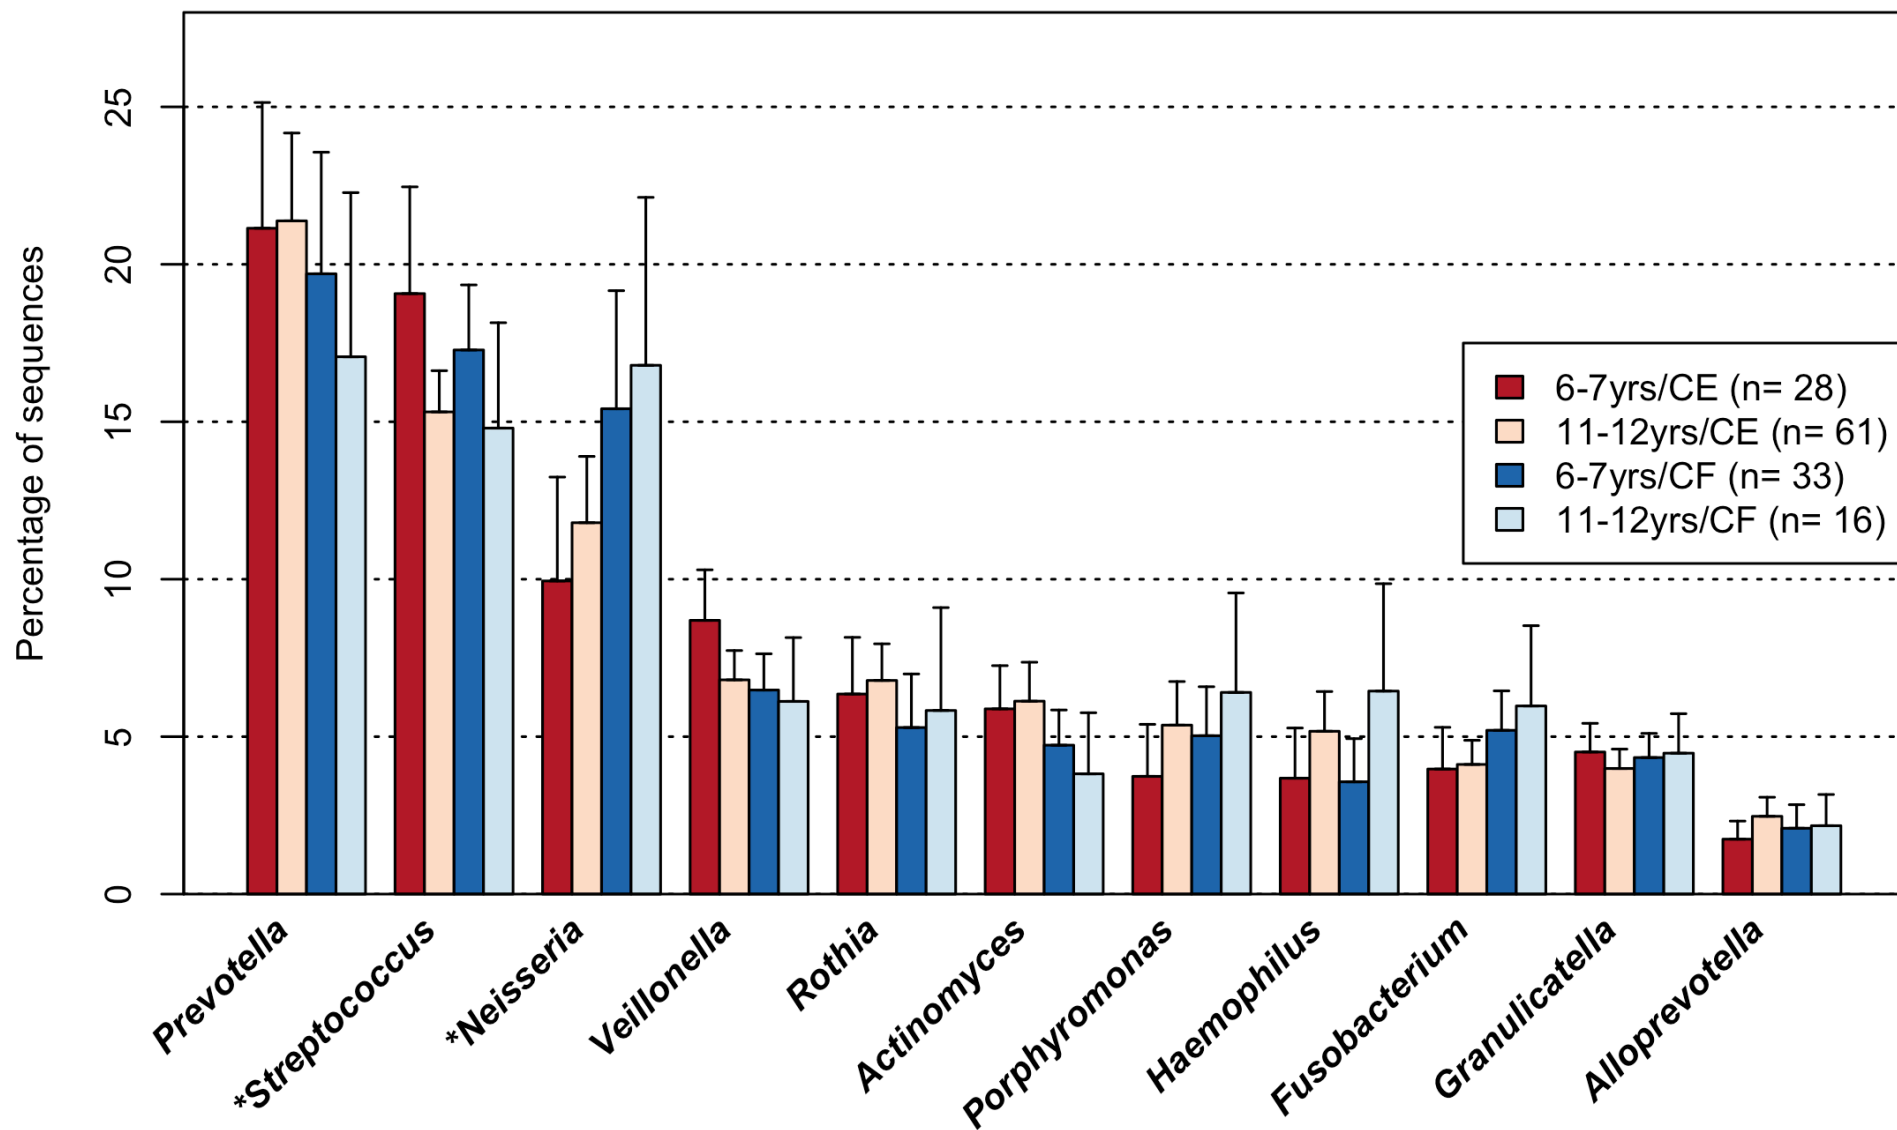

Supplement: mSphere.01252-20-sf003.pdf [file mSphere.01252-20-sf003.pdf]
